cause we have at our disposal instruments which can measure these concentrations with greater accuracy. I recall an anesthesiologist who routinely sniffed the anesthetic mixture to determine whether the vaporizer were functioning and whether the strength of the odor agreed with the dial setting on the vaporizer. One day, prior to administering the anesthetic, he sniffed the gas, became lightheaded, and slipped to the floor in a stupor.

In an academic atmosphere, where residents and nurses are trained to administer anesthetics, a device or monitor which can diminish or eliminate hazards becomes a desirable piece of equipment.

CHARLES LOMANTO, M.D.  
Attending Anesthesiologist  
Memorial Hospital for Cancer  
and Allied Diseases  
New York, New York 10021

---

### Obstetrics and Pediatrics

**RESPIRATORY DISTRESS SYNDROME** Two groups of investigators, one from the Montreal Children's Hospital and the other from the Toronto Sick Children's Hospital, reported separately on the use of intermittent negative-pressure ventilation (INPV) in the treatment of newborns who had respiratory distress syndrome. Each infant was placed in a tank-type respirator with the head outside and an airtight seal at the neck. The tank was capable of producing as much as 60 cm H<sub>2</sub>O negative pressure. Criteria for inclusion in the Montreal study were: PaO<sub>2</sub> less than 40 to 50 mm Hg breathing pure oxygen; PaCO<sub>2</sub> greater than 70 to 75 mm Hg; and pH less than 7.1 to 7.2; and, in the Toronto study, central cyanosis or PaO<sub>2</sub> less than 50 mm Hg after 15 minutes of breathing pure oxygen. Infants were supplied with warm humidified oxygen around the head while INPV was in progress. Endotracheal intubation was done in some of the patients in the Toronto study, while none of the patients in the Montreal study had tracheal tubes. Survival rates were 51.6 per cent in the Montreal study and 38 per cent in the Toronto study. Corresponding survival rates of infants on IPPB and bicarbonate were 4.5 per cent and less than 10 per cent, respectively. Although the infants received pure oxygen for prolonged periods, there were no clinical or histologic manifestations of oxygen toxicity. In the Montreal study, correction of PaO<sub>2</sub>, pH, and PaCO<sub>2</sub> required averages of 10.5, 11.6, and 22.6 hours, respectively. It was concluded that INPV was more efficient and accompanied by fewer complications than IPPB for the treatment of respiratory distress syndrome. (Stern, L., and others: *Negative Pressure Artificial Respiration: Use in Treatment of Respiratory Failure of the Newborn*, *Canad. Med. Ass. J.* 102: 595 (March) 1970, and Linsao, L. S., and others: *Negative Pressure Artificial Respiration: Use in Treatment of Respiratory Distress Syndrome of the Newborn*, *Canad. Med. Ass. J.* 102: 602 (March) 1970.)

**ABSTRACTER'S COMMENT:** Management of cases of respiratory distress syndrome with intermittent negative-pressure ventilation, as reported by these two groups of authors, presents several intriguing points. There is no doubt that the survival rates reported are impressive for a disease that has notoriously defied attempts to control it. The absence of clinical and histologic manifestations of oxygen toxicity despite the prolonged use of pure oxygen is also interesting. The success of INPV where IPPB failed is somewhat perplexing in view of the similarities in the magnitude and direction of pressure gradients produced by the two systems. Finally, these two papers underscore the importance of meticulous and dedicated care by physicians and nurses, and the magnitude of the supportive facilities required for such an undertaking.
